# Supplementary material for: Fundamental functions of peripheral and core pyridine rings in a series of bis-terpyridine derivatives for high-performance organic light-emitting devices
Source: Royal Society of Chemistry journal article supplement (doi:10.1039/c6tc02631a), 2016-01-01
Supplement: c6tc02631a1.pdf [file c6tc02631a1.pdf]

## Supporting Information

### **Fundamental Functions of Peripheral and Core Pyridine Rings in a Series of Terpyridine Derivatives for High-Performance Organic Light-Emitting Devices**

*Yuichiro Watanabe,<sup>[a]</sup> Ryo Yoshioka,<sup>[a]</sup> Hisahiro Sasabe,<sup>\*,[a],[b]</sup> Takahiro Kamata,<sup>[a]</sup> Hiroshi Katagiri,<sup>[a],[b]</sup> Daisuke Yokoyama,<sup>[a],[b]</sup> and Junji Kido<sup>\*,[a],[b],[c]</sup>*

*[a] Department of Organic Materials Science, Graduate School of Science and Engineering, Yamagata University, 4-3-16 Jonan, Yonezawa, Yamagata, 992-8510 Japan.*

*[b] Research Center for Organic Electronics (ROEL), Yamagata University, 4-3-16 Jonan, Yonezawa, Yamagata, 992-8510 Japan.*

*[c] Frontier Center for Organic System Innovations(COI) Yamagata University, 4-3-16 Jonan, Yonezawa, Yamagata 992-8510, Japan*

*E-mail: h-sasabe@yz.yamagata-u.ac.jp; kido@yz.yamagata-u.ac.jp*

#### **Table of Contents:**

- 1. Synthesis**
- 2. X-Ray Crystal Structure Determination**
- 3. TGA Analysis**
- 4. Optical Properties**
- 5. <sup>1</sup>H NMR analysis of B3PyPB and 3-TerPyB**
- 6. Organic Light-Emitting Devices (OLEDs)**
- 7. References**
- 8. Table of contents**

## 1. Experimental Section

*General considerations:* Quantum chemical calculations were performed using the hybrid density functional theory (DFT) functional Becke and Hartree-Fock exchange and Lee Yang and Parr correlation (B3LYP) as implemented by the Gaussian 09 program packages. Electrons were described by the Pople's 6-31G(d,p) and 6-311 + G(d,p) basis sets for molecular structure optimization and single-point energy calculations, respectively.  $^1\text{H}$  NMR spectrum was recorded on JEOL 400 (400 MHz) spectrometer. Mass spectrum was obtained using a JEOL JMS-K9 mass spectrometer. Differential scanning calorimetry (DSC) was performed using a Perkin-Elmer Diamond DSC Pyris instrument under nitrogen atmosphere at a heating rate of  $10^\circ\text{C min}^{-1}$ . Thermogravimetric analysis (TGA) was undertaken using a SEIKO EXSTAR 6000 TG/DTA 6200 unit under nitrogen atmosphere at a heating rate of  $10^\circ\text{C min}^{-1}$ . UV-Vis spectra were measured using a Shimadzu UV-3150 UV-vis-NIR spectrophotometer. Photoluminescence spectra were measured using a FluroMax-2 (Jobin-Yvon-Spex) luminescence spectrometer. The ionization potential ( $I_p$ ) was determined by a photoelectron yield spectroscopy (PYS) under the vacuum ( $\sim 10^{-3}$  Pa). The deposited films for PYS measurement were transported through in nitrogen globe box without atmospherically exposed. AFM images were recorded on a Bruker Dimension Icon.

*Device Fabrication and Characterization:* CBP and Liq were purchased from eRay. TAPC was purchased from TCI.  $\text{Ir(ppy)}_3$  was purchased from Chemipro Kasei. CBP and TAPC were purified by temperature-gradient sublimation in vacuum. Phosphorescent OLEDs were grown on glass substrates precoated with a 130-nm thick material of indium-tin oxide (ITO) having a sheet resistance of  $15 \Omega/\text{sq}$ . The substrates were cleaned with ultrapurified water and organic solvents, and then dry-cleaned for 30 min by exposure to UV-ozone. The organic materials were deposited onto the ITO substrate under the vacuum (ca.  $10^{-5}$  Pa), successively. Al was patterned using a shadow mask with an array of  $2 \text{ mm} \times 2 \text{ mm}$  openings without breaking the vacuum (ca.  $10^{-5}$  Pa). All devices were encapsulated immediately after preparation under a nitrogen atmosphere using epoxy glue and glass lids. The EL spectra were taken using an optical multichannel analyzer Hamamatsu Photonics PMA-11. The current density-voltage and luminance-voltage characteristics were measured using a Keithley source measure unit 2400 and a Minolta CS200 luminance meter, respectively.

## 2. Synthesis

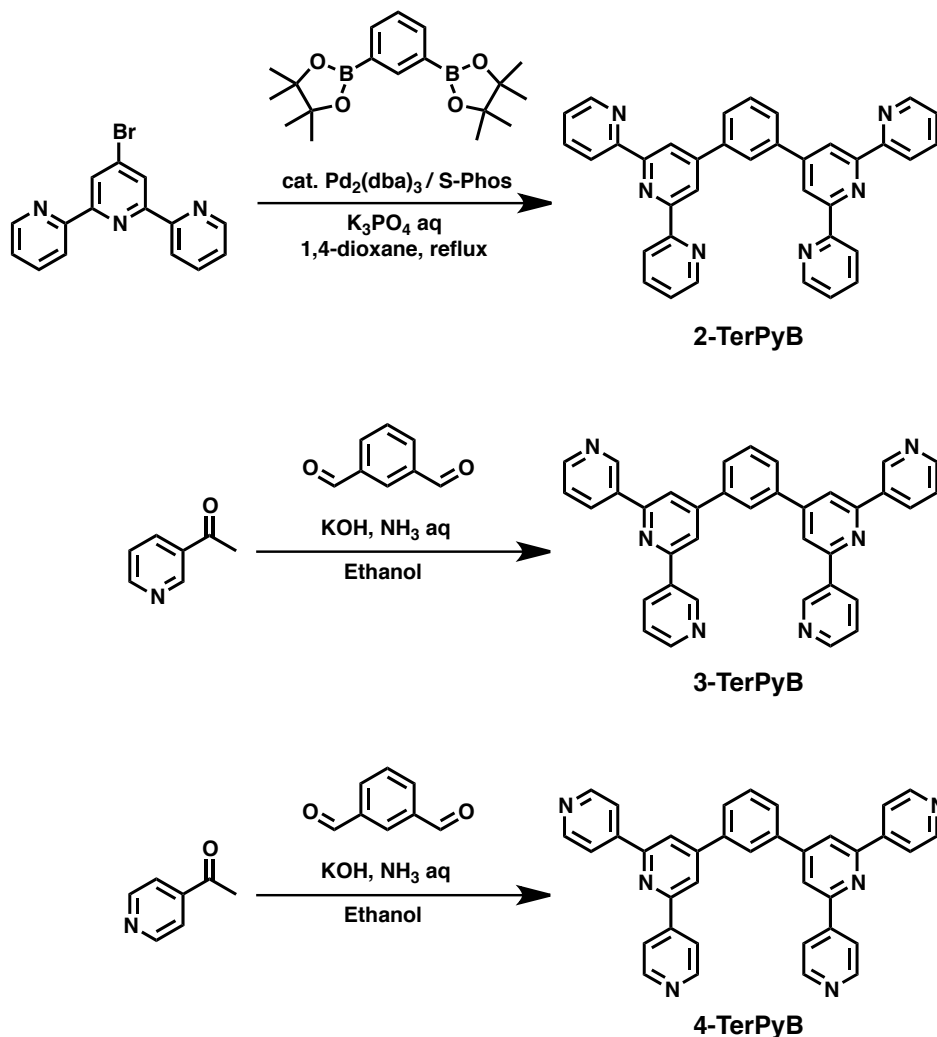

**Scheme S1.** Synthetic route of BPy and BPyPh derivatives.

**Synthesis of 2-TerPyB.** 4'-chloro-2,2':6',2''-terpyridine (2.40 g, 7.69 mmol) and 1,3-Benzenediboronic acid bis(pinacolate)ester (1.16g, 3.51 mmol) were added to a round bottom flask. 1,4-Dioxane (55 mL) and aqueous  $\text{K}_3\text{PO}_4$  (1.35 M, 19 mL) were added and nitrogen bubbled through the mixture for 1 hour. Then,  $\text{Pd}_2(\text{dba})_3$  (0.067 g, 0.073 mmol) and 2-dicyclohexylphosphino-2',6'-dimethoxybiphenyl (S-Phos) (0.064 g, 0.156 mmol) were added and the resultant mixture was vigorously stirred for 14 hours at reflux temperature under  $\text{N}_2$  flow. The precipitate was filtered, and washed with water and methanol. The resulting off-white solid was dissolved in chloroform/Methanol = 20/1 (315 mL), filtered through Celite pad (75 cc). The clear filtrate was further purified by washing with hexane to afford 2-TerPyB as a off white solid (1.86 g, 98%).  $^1\text{H}$  NMR (400 MHz,  $\text{CDCl}_3$ ):  $\delta$  = 8.81 (s, 4H), 8.77–8.68 (m, 8H), 8.34 (s, 1H), 7.98 (d,  $J$  = 7.8 Hz, 2H), 7.90 (t,  $J$  = 7.8 Hz, 4H), 7.67 (t,  $J$  = 7.8 Hz, 1H), 7.42–7.33 (m, 4H) ppm;  $^{13}\text{C}$  NMR (100 MHz,  $\text{CDCl}_3$ ):  $\delta$  = 156.2, 156.0, 150.2, 149.2, 136.9, 128.2, 123.9, 121.4, 119.3 ppm; EI-MS:  $m/z$  541  $[\text{M}+\text{H}]^+$ ; Anal calcd for  $\text{C}_{36}\text{H}_{24}\text{N}_6$ : C, 79.98; H, 4.47; N, 15.55%. Found. C, 80.12; H, 4.29; N, 15.63%.

**Synthesis of 3-TerPyB.** 3-acetyl-pyridine (26.4 mL, 0.242 mol) was added into a solution of isophthalaldehyde (8.05 g, 0.060 mol) in ethanol (966 mL). Then, potassium hydroxide pellets

(18.5 g, 86%, 0.284 mol) and 25%  $\text{NH}_3$  *aq* (406 mL, 25%, 5.39 mol) were added to the solution. The resultant mixture was stirred for 6.5 hours at room temperature. The precipitate was filtered, and washed with water and ethanol. The resulting pale-yellow solid was purified by chromatography on silica gel (eluent:  $\text{CHCl}_3/\text{CH}_3\text{OH} = 100:2$  to  $100:5$  v/v) to afford 3-TerPyB (4.62 g, 14%) as a off white solid.  $^1\text{H}$  NMR (400 MHz,  $\text{CDCl}_3$ ):  $\delta = 9.41$  (d,  $J = 1.8$  Hz, 4H), 8.73 (dd,  $J = 1.4, 4.6$  Hz, 4H), 8.54 (dt,  $J = 1.8, 7.8$  Hz, 4H), 8.08–8.02 (m, 5H), 7.95–7.84 (m, 2H), 7.78 (t,  $J = 7.8$  Hz, 1H), 7.49 (dd,  $J = 4.8, 7.8$  Hz, 4H) ppm;  $^{13}\text{C}$  NMR (100 MHz,  $\text{CDCl}_3$ ):  $\delta = 155.7, 150.4, 148.5, 134.6, 134.5, 128.3, 123.7, 117.9$  ppm; EI-MS:  $m/z$  541  $[\text{M}+\text{H}]^+$ ; Anal calcd for  $\text{C}_{36}\text{H}_{24}\text{N}_6$ : C, 79.98; H, 4.47; N, 15.55%. Found. C, 80.12; H, 4.37; N, 15.56%.

**Synthesis of 4-TerPyB.** off white solid (1.46 g, 23% yield).  $^1\text{H}$  NMR (400 MHz,  $\text{CDCl}_3$ ):  $\delta = 8.84$ – $8.78$  (m, 8H), 8.13– $8.08$  (m, 12H), 8.02 (s, 1H), 7.91– $7.85$  (m, 2H), 7.79 (t,  $J = 7.6$  Hz, 1H) ppm; EI-MS:  $m/z$  541  $[\text{M}+\text{H}]^+$ . Anal calcd for  $\text{C}_{36}\text{H}_{24}\text{N}_6$ : C, 79.98; H, 4.47; N, 15.55%. Found. C, 80.26; H, 4.15; N, 15.59%.

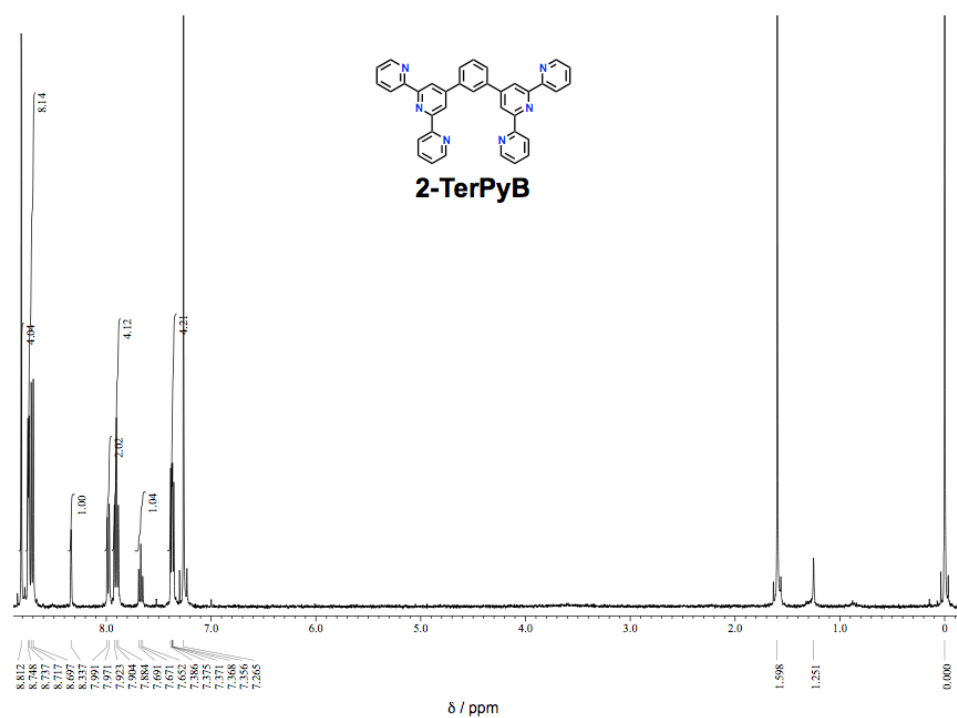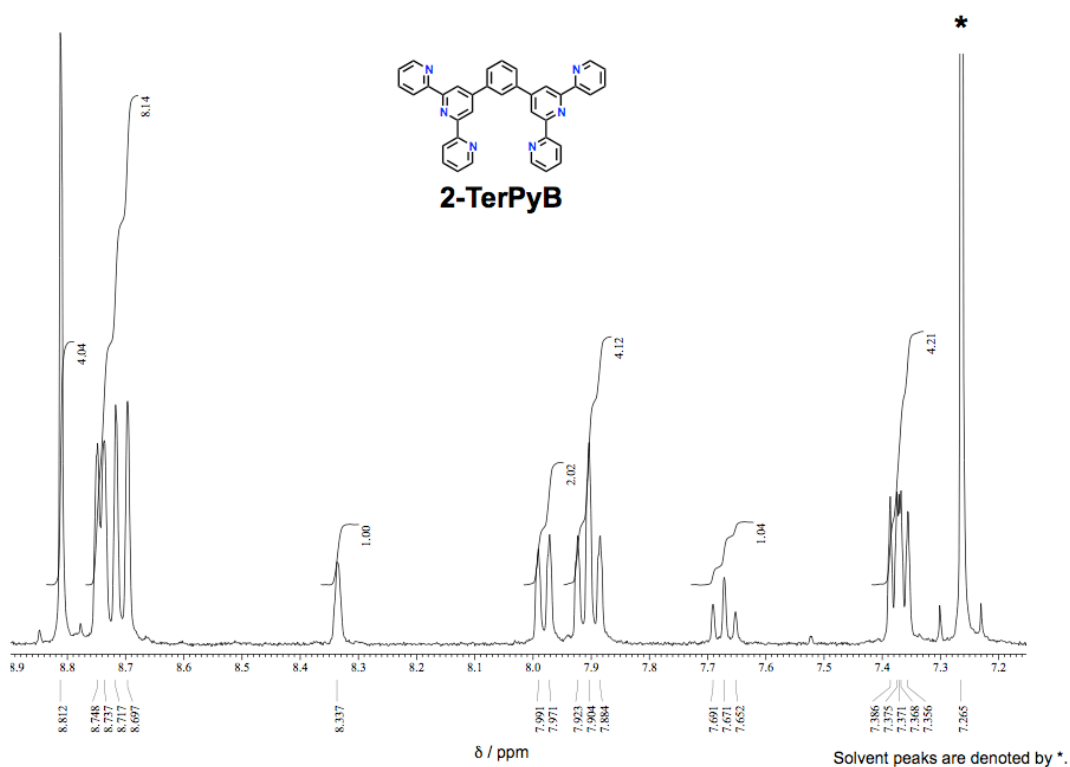

**Figure S1.**  $^1\text{H}$  NMR spectra of 2-TerPyB (400 MHz,  $\text{CDCl}_3$ ).

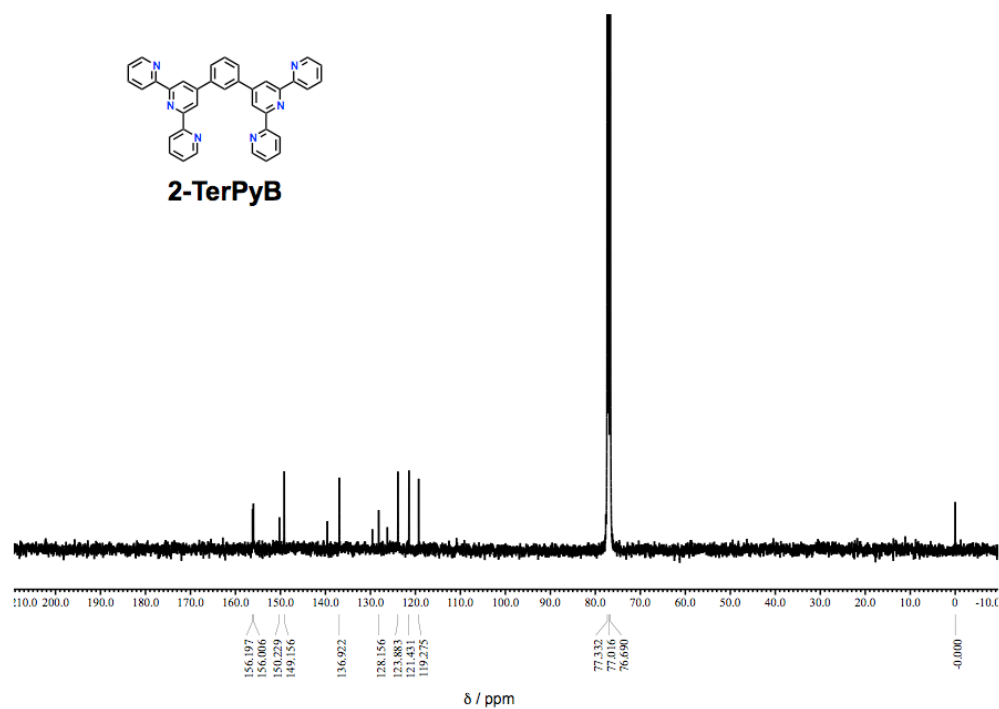

**Figure S2.**  $^{13}\text{C}$  NMR spectra of 2-TerPyB (400 MHz,  $\text{CDCl}_3$ ).

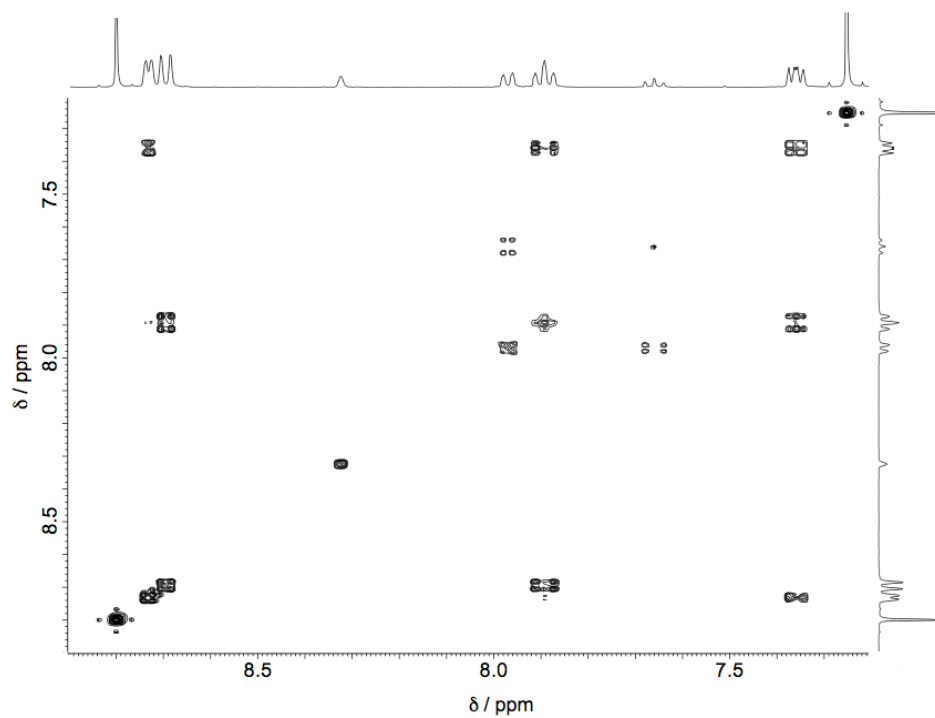

**Figure S3.**  $^1\text{H}$ - $^1\text{H}$  COSY spectrum of 2-TerPyB (400 MHz,  $\text{CDCl}_3$ ).

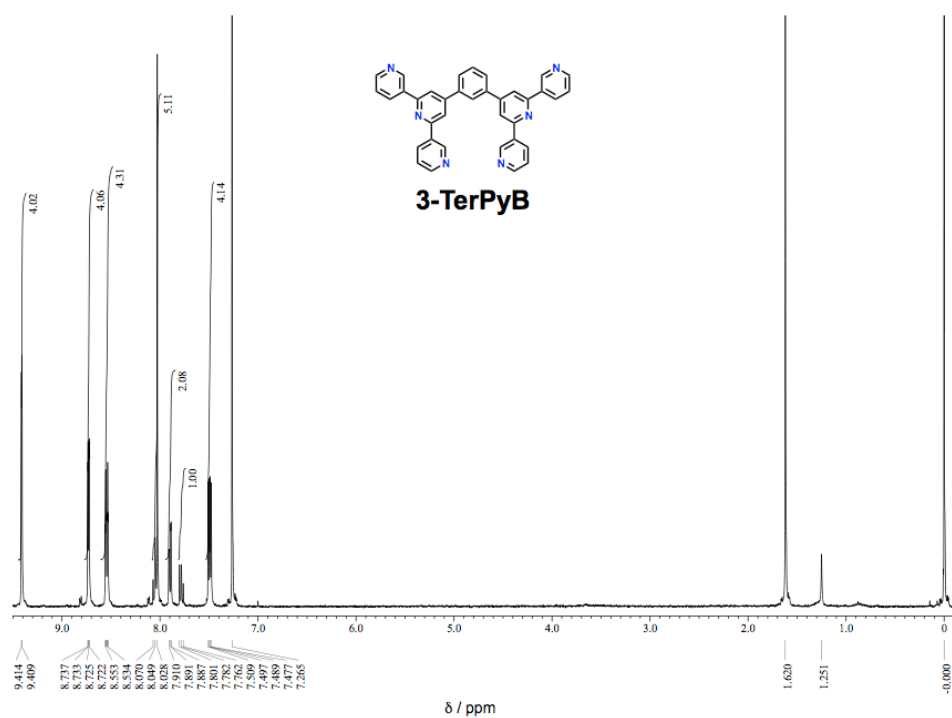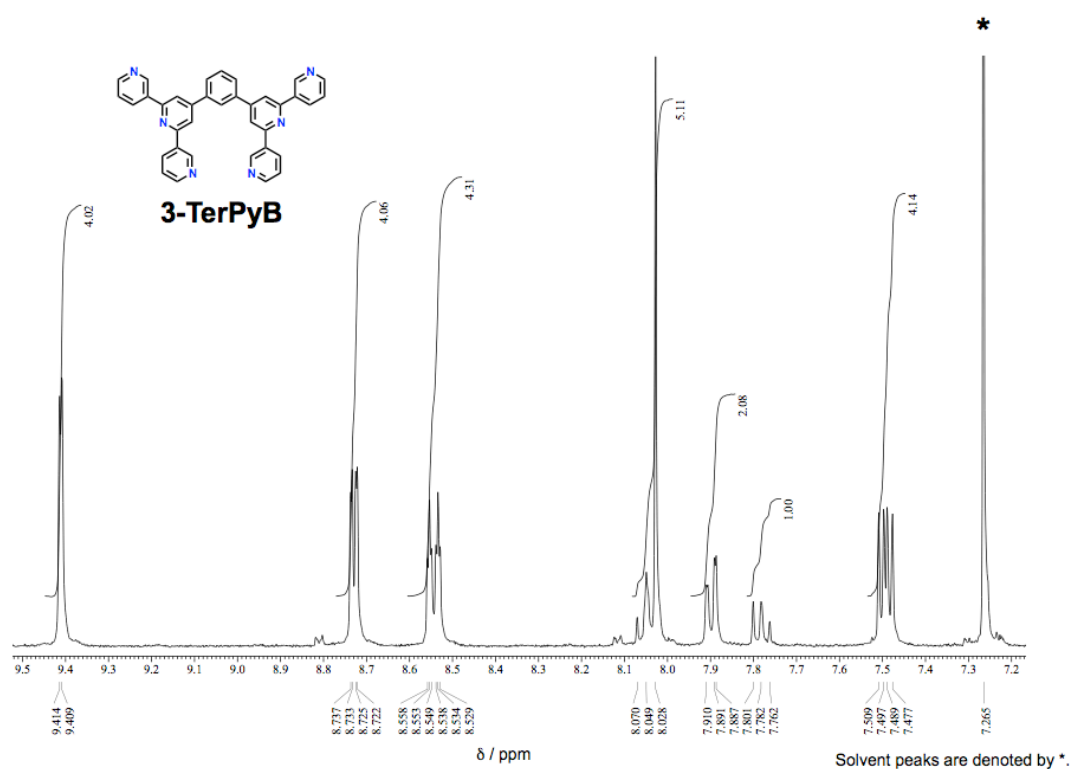

**Figure S4.**  $^1\text{H}$  NMR spectra of 3-TerPyB (400 MHz,  $\text{CDCl}_3$ ).

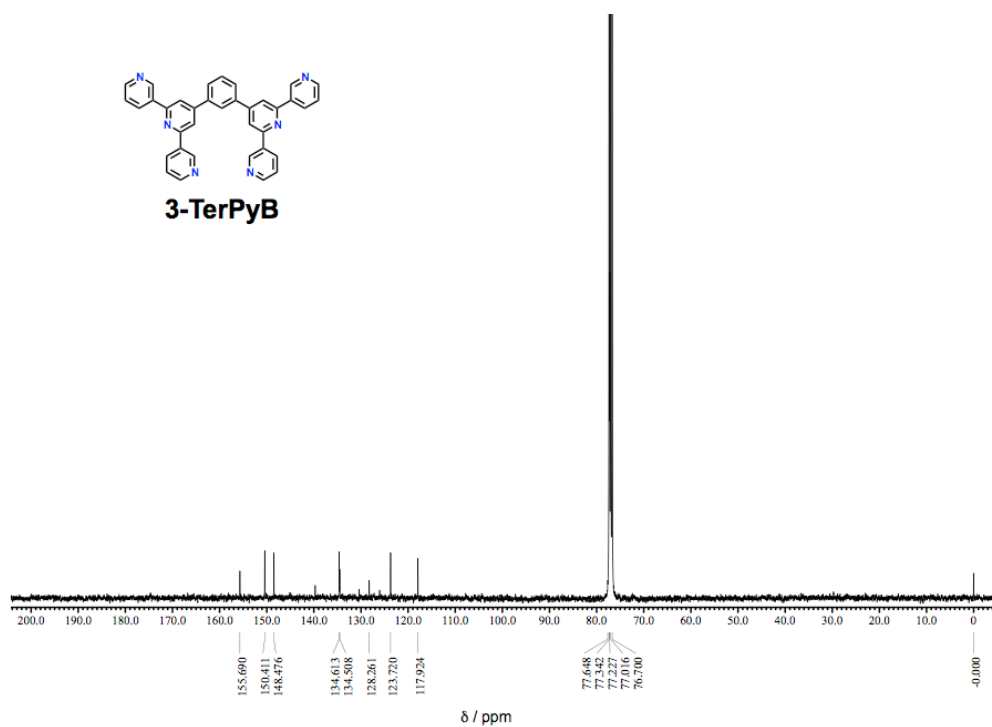

**Figure S5.**  $^{13}\text{C}$  NMR spectra of 3-TerPyB (400 MHz,  $\text{CDCl}_3$ ).

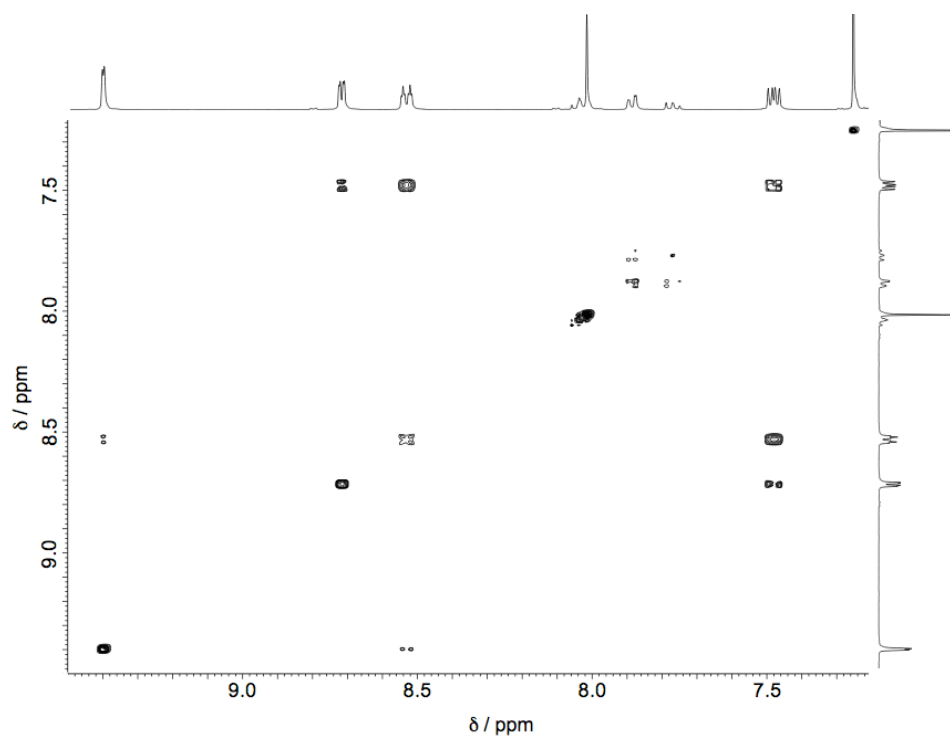

**Figure S6.**  $^1\text{H}$ - $^1\text{H}$  COSY spectrum of 3-TerPyB (400 MHz,  $\text{CDCl}_3$ ).



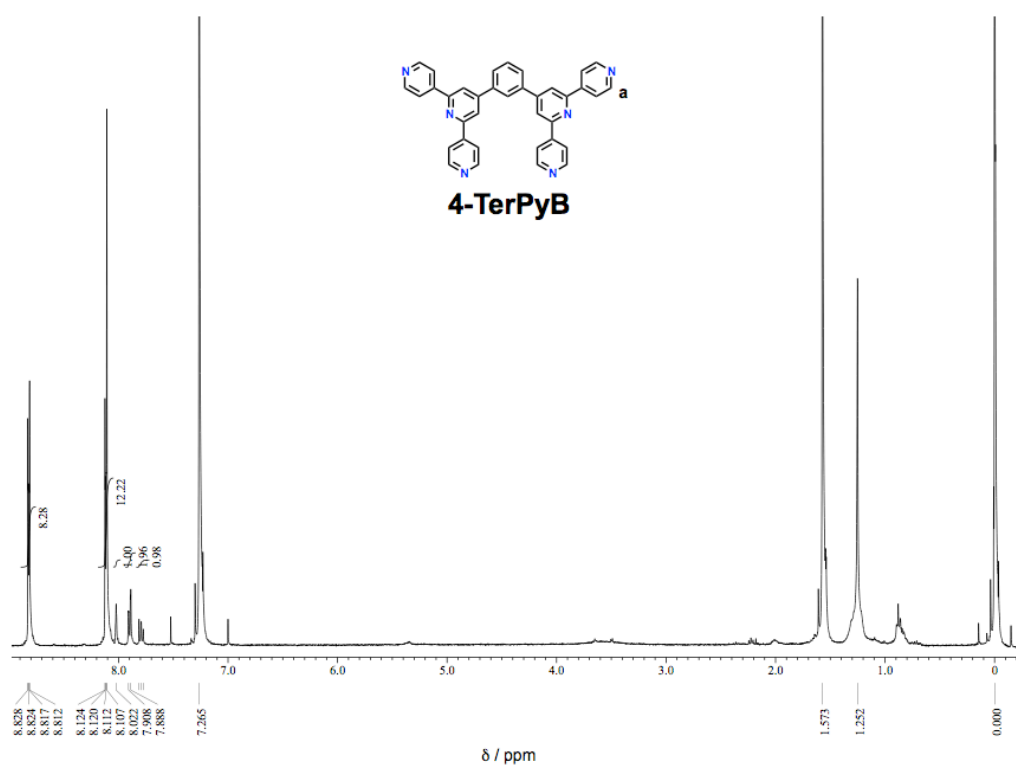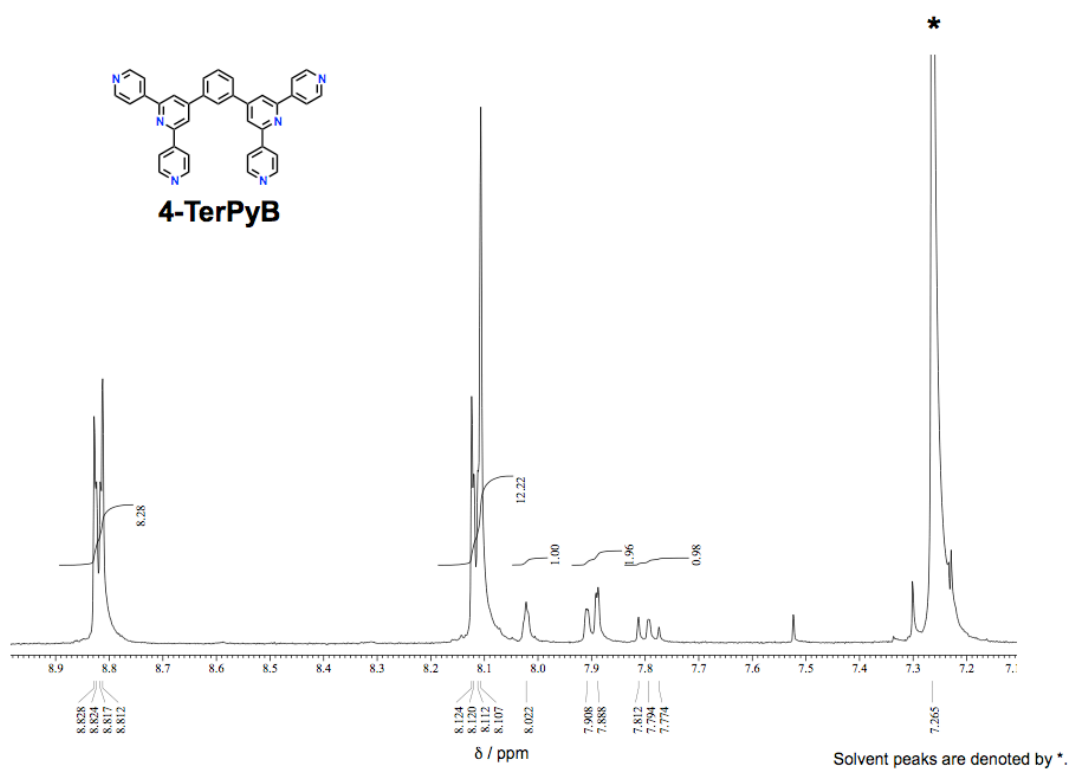

**Figure S7.**  $^1\text{H}$  NMR spectra of 4-TerPyB (400 MHz,  $\text{CDCl}_3$ ).

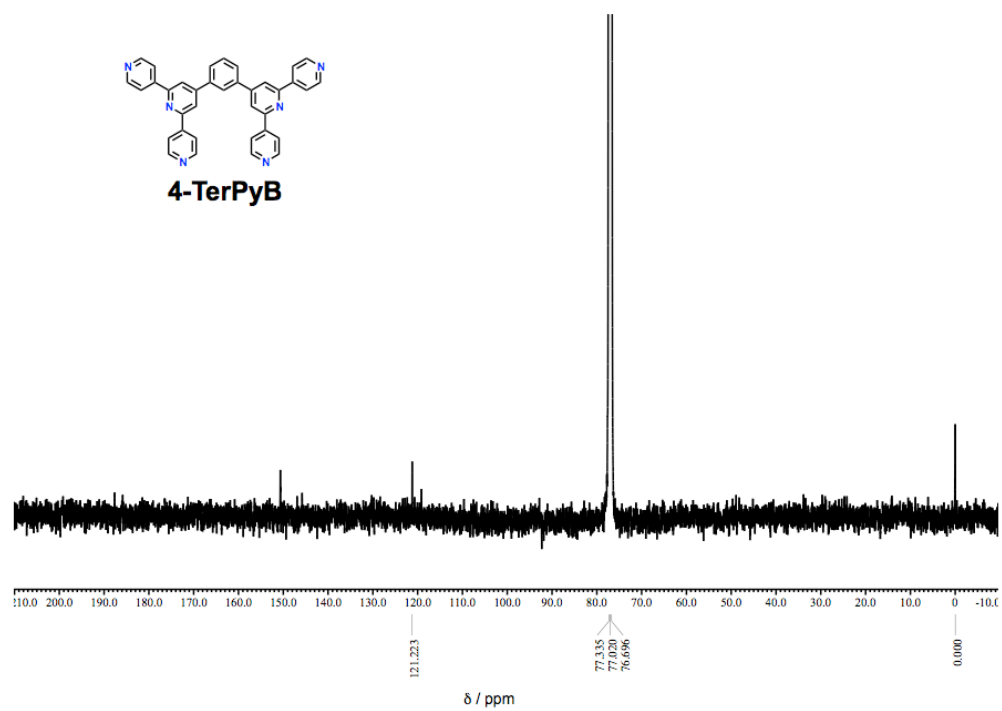

**Figure S8.**  $^{13}\text{C}$  NMR spectra of 4-TerPyB (400 MHz,  $\text{CDCl}_3$ ).

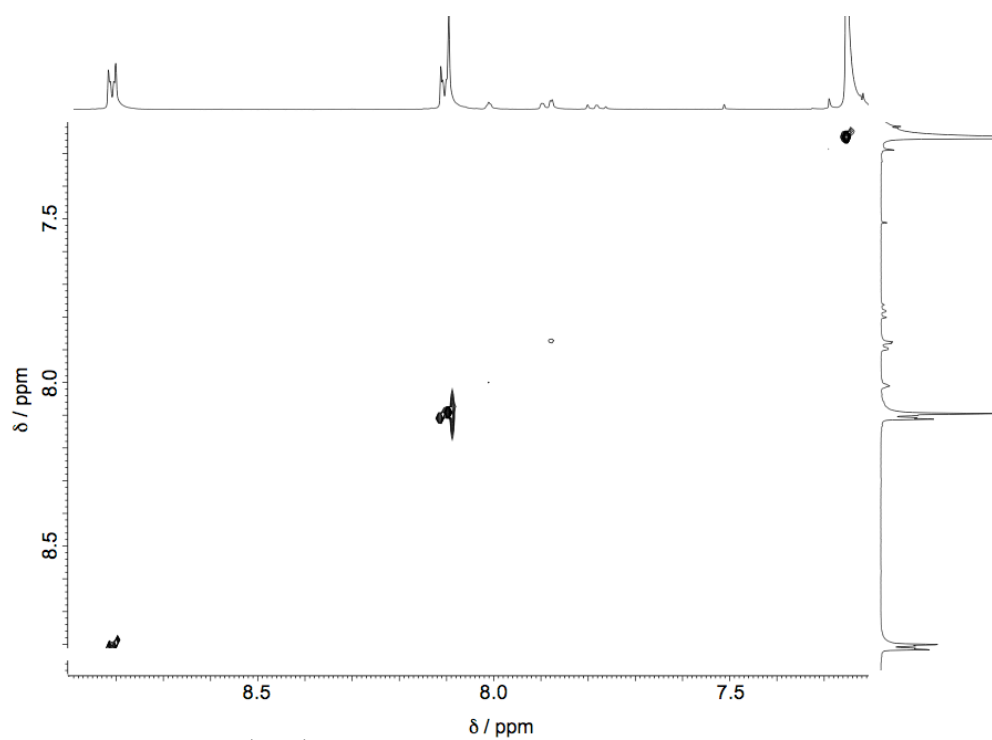

**Figure S9.**  $^1\text{H}$ - $^1\text{H}$  COSY spectrum of 4-TerPyB (400 MHz,  $\text{CDCl}_3$ ).

## 2. X-ray Crystallographic Structure Determination

### 4-TerPyB

The X-ray diffraction data for 4-TerPyB was collected on a Rigaku Saturn 724 CCD diffractometer with Mo- $K\alpha$  radiation ( $\lambda = 0.71075$  Å) at 93 K. Single crystal of 4-TerPyB [ $C_{36}H_{24}N_6$ , Mw = 540.61] suitable for X-ray analysis were grown by slow gradient sublimation, and a colourless crystal with dimensions  $0.20 \times 0.20 \times 0.20$  mm<sup>3</sup> was selected for intensity measurements. The unit cell was monoclinic with the space group  $P 2_1/c$ . Lattice constants with  $Z = 4$ ,  $\rho_{\text{calcd}} = 1.406$  g cm<sup>-3</sup>,  $\mu = 0.086$  mm<sup>-1</sup>,  $F(000) = 1128$ , and  $2\theta_{\text{max}} = 50.48^\circ$  were  $a = 7.5568(5)$ ,  $b = 32.8316(17)$  Å,  $c = 10.9474(7)$  Å,  $\alpha = 90^\circ$ ,  $\beta = 109.928(3)^\circ$ ,  $\gamma = 90^\circ$ , and  $V = 2553.4(3)$  Å<sup>3</sup>. A total of 31257 reflections were collected, of which 5821 reflections were independent ( $R_{\text{int}} = 0.0293$ ). Structure was refined to final  $R_1 = 0.0449$  for 5821 data [ $I > 2\sigma(I)$ ] with 379 parameters and  $wR_2 = 0.1279$  for all data,  $GOF = 1.060$ , and residual electron density max./min. = 0.400 and  $-0.229$  e.Å<sup>-3</sup>. The ORTEP drawing is shown in **Figure S13**, and the crystal data and structure refinement are listed in **Table S1**. The data collection, cell refinement, and data reduction were conducted using the CrystalClear-SM Expert software<sup>[1]</sup>. The structure was solved by direct methods using the program SHELXS-97<sup>[2]</sup> and refined by full matrix least squares methods on  $F^2$  using SHELXL-97<sup>[3]</sup>. All the materials for publication were prepared using the Yadokari-XG 2009 software<sup>[4]</sup>. All non-hydrogen atoms were refined anisotropically. The positions of all hydrogen atoms were calculated geometrically and refined a riding model.

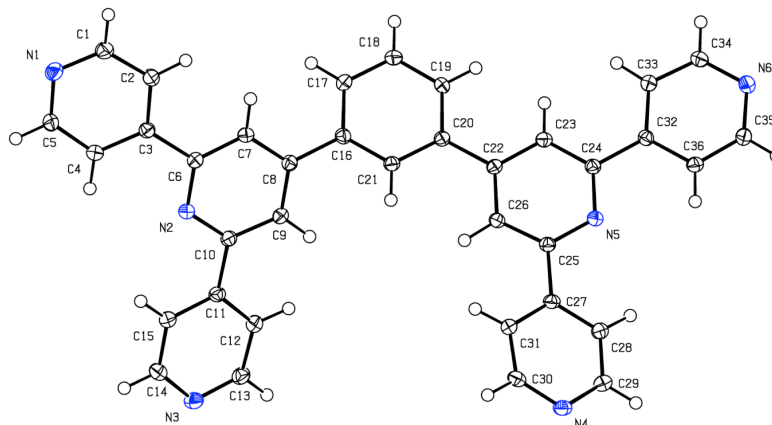

**Figure S10.** ORTEP diagrams of 4-TerPyB with thermal ellipsoids at 50% probability.

**Table S1.** Crystal data and structure refinement for 4-TerPyB.

|                                                     |                                                                 |                        |
|-----------------------------------------------------|-----------------------------------------------------------------|------------------------|
| Empirical formula                                   | C <sub>36</sub> H <sub>24</sub> N <sub>6</sub>                  |                        |
| Formula weight                                      | 540.61                                                          |                        |
| Temperature                                         | 93 K                                                            |                        |
| Wavelength                                          | 0.71075 Å                                                       |                        |
| Crystal system                                      | Monoclinic                                                      |                        |
| Space group                                         | <i>P</i> 2 <sub>1</sub> /c                                      |                        |
| Unit cell dimensions                                | <i>a</i> = 7.5568(5) Å                                          | <i>α</i> = 90°         |
|                                                     | <i>b</i> = 32.8316(17) Å                                        | <i>β</i> = 109.928(3)° |
|                                                     | <i>c</i> = 10.9474(7) Å                                         | <i>γ</i> = 90°         |
| Volume                                              | 2553.4(3) Å <sup>3</sup>                                        |                        |
| <i>Z</i>                                            | 4                                                               |                        |
| Density (calculated)                                | 1.406 g/cm <sup>3</sup>                                         |                        |
| Absorption coefficient                              | 0.086 mm <sup>-1</sup>                                          |                        |
| <i>F</i> (000)                                      | 1128                                                            |                        |
| Crystal size                                        | 0.200 × 0.200 × 0.200 mm <sup>3</sup>                           |                        |
| Theta range for data collection                     | 3.175 to 27.479°                                                |                        |
| Index ranges                                        | −9 ≤ <i>h</i> ≤ 9, −42 ≤ <i>k</i> ≤ 42, −14 ≤ <i>l</i> ≤ 14     |                        |
| Reflections collected                               | 31257                                                           |                        |
| Independent reflections                             | 5821 [ <i>R</i> (int) = 0.0293]                                 |                        |
| Completeness to theta = 25.242°                     | 99.7 %                                                          |                        |
| Absorption correction                               | Semi-empirical from equivalents                                 |                        |
| Max. and min. transmission                          | 1.000 and 0.925                                                 |                        |
| Refinement method                                   | Full-matrix least-squares on <i>F</i> <sup>2</sup>              |                        |
| Data / restraints / parameters                      | 5821 / 0 / 379                                                  |                        |
| Goodness-of-fit on <i>F</i> <sup>2</sup>            | 1.060                                                           |                        |
| Final <i>R</i> indices [ <i>I</i> > 2σ( <i>I</i> )] | <i>R</i> <sub>1</sub> = 0.0449, <i>wR</i> <sub>2</sub> = 0.1237 |                        |
| <i>R</i> indices (all data)                         | <i>R</i> <sub>1</sub> = 0.0488, <i>wR</i> <sub>2</sub> = 0.1279 |                        |
| Extinction coefficient                              | n/a                                                             |                        |
| Largest diff. peak and hole                         | 0.400 and −0.229 e.Å <sup>-3</sup>                              |                        |

### 3. TGA analysis

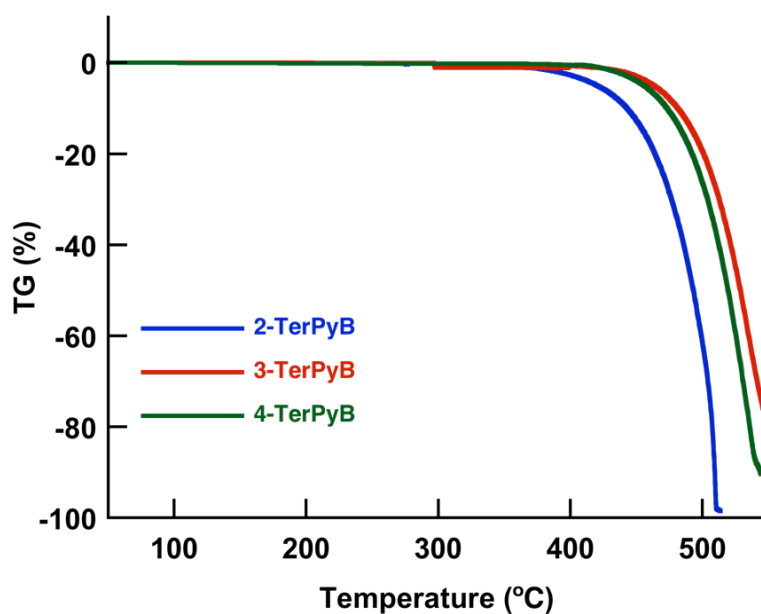

**Figure S11.** TGA measurement for TerPyBs. The heating rate is 10°C/min under N<sub>2</sub>.

### 4. Optical properties

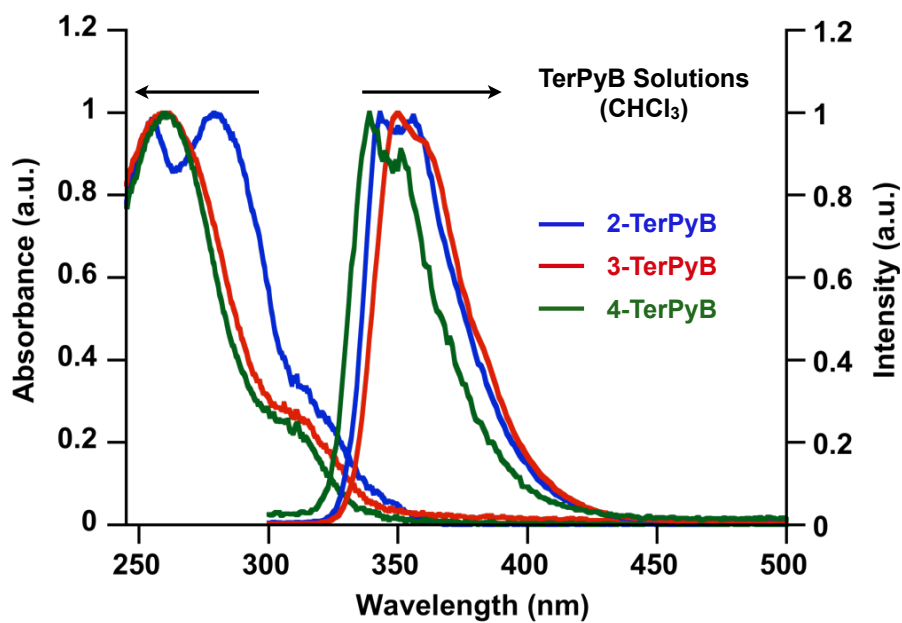

**Figure S12.** UV-vis, PL spectra of TerPyB in chloroform solution.

## 5. $^1\text{H}$ NMR analysis of B3PyPB and 3-TerPyB

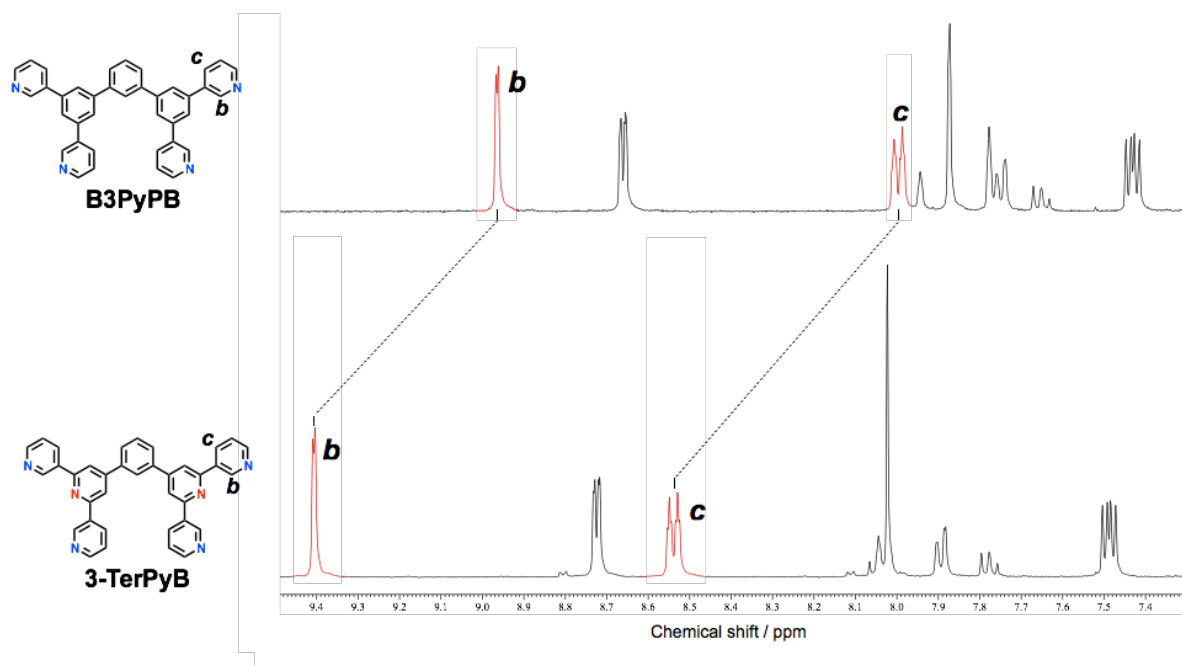

**Figure S13.**  $^1\text{H}$  NMR spectra of B3PyPB and 3-TerPyB in  $\text{CDCl}_3$ . The two protons (proton *b* and *c*), which could interact with N atoms of core pyridines were highlighted with red line. The both protons of 3-TerPyB appeared further downfield than those of B3PyPB in  $\text{CDCl}_3$  solution. One possible reason is that 3-TerPyB forms intramolecular H-bonds.

## 6. OLEDs

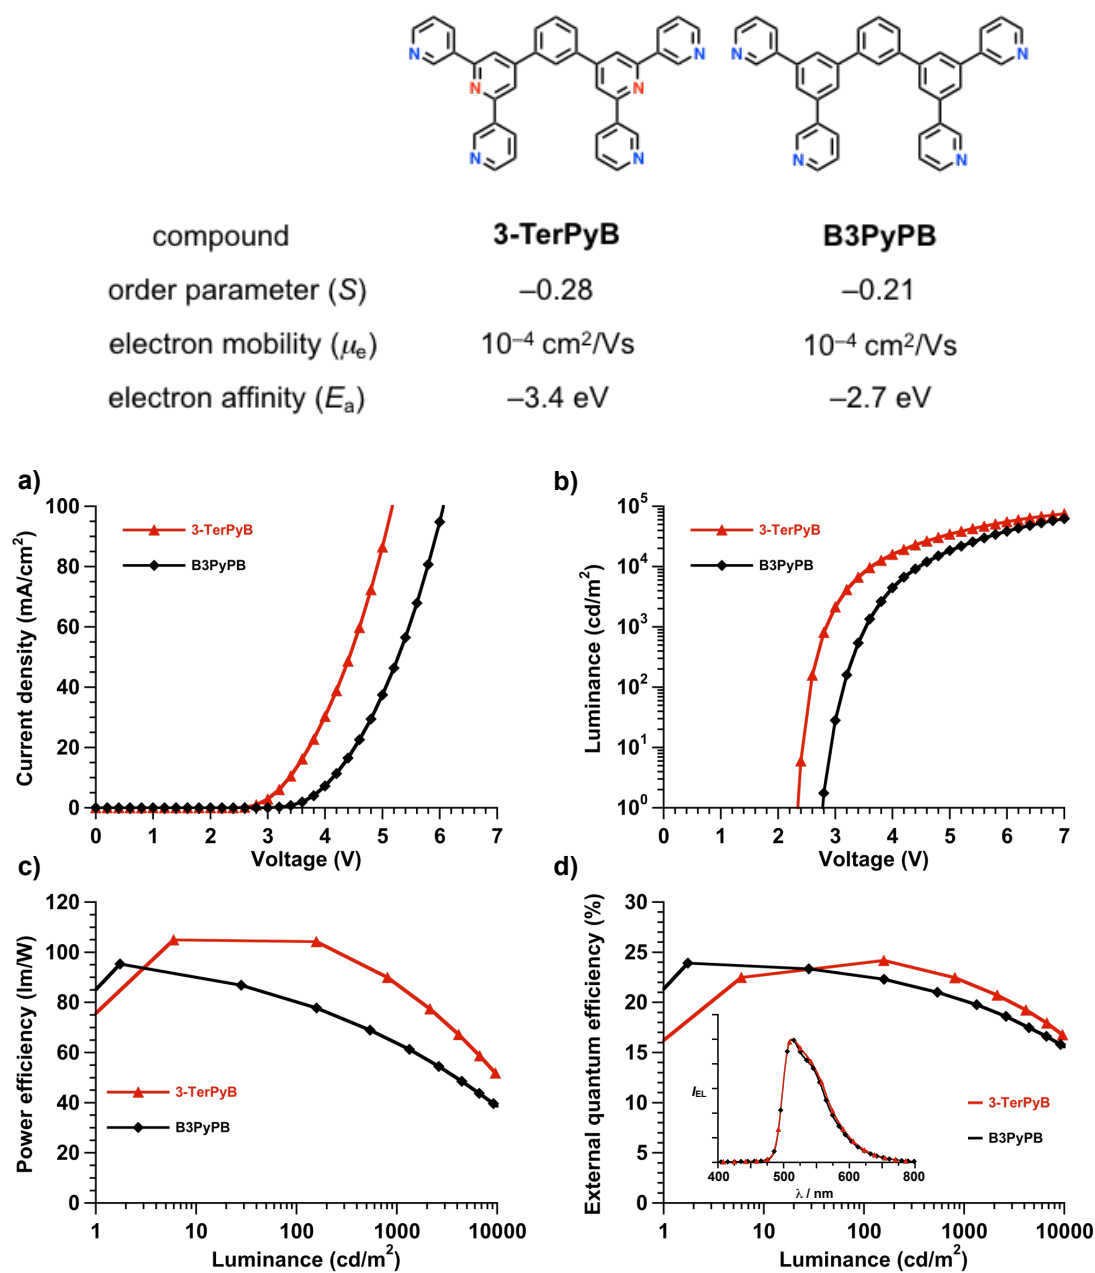

**Figure S14.** Device performance of the green organic LEDs: a) Current density–voltage characteristics. b) Luminance–voltage characteristics. c) Power efficiency–luminance characteristics. d) External quantum efficiency–luminance characteristics. The inset shows EL spectra at 1 mA.

## 7. References

- [1] CrystalClear-SM Expart: Rigaku Corporation, Tokyo, Japan, **2011**.
- [2] SHELXS"97: Sheldrick, G. M. Program for the Solution of Crystal Structures; *Acta Crystallogr. A* **2008**, *64*, 112–122.
- [3] SHELXL"97: Sheldrick, G. M. Program for the Refinement of Crystal Structures; *Acta Crystallogr. A* **2008**, *64*, 112–122.
- [4] a) Yadokari"XG: Wakita, K. Software for crystal Structure Analyses, **2001**; b) Yadokari"XG**2009**: C. Kabuto, S. Akine, T. Nemoto, E. Kwon. Release of Software for Crystal Structure Analyses; *J. Cryst. Soc. Jpn.* **2009**, *51*, 218–224.
